# Supplementary material
Source: PubMed Central journal article supplement (PMC2847836)
Supplement: NIHMS174210-supplement-Supplementary_Data.pdf [file NIHMS174210-supplement-Supplementary_Data.pdf]

*Articles from Anorexia Nervosa Expected  
Body Weight Calculation Literature Search  
99 Total Studies*

- Abbate-Daga, G., Piero, A., Gramaglia, C., Gandione, M., & Fassino, S. (2007). An attempt to understand the paradox of anorexia nervosa without drive for thinness. *Psychiatry Research, 149*, 215-221.
- Alvarez-Rayon, G., Mancilla-Diaz, J. M., Vazquez-Arevalo, R., Unikel-Santoncini, C., Caballero-Romo, A., & Mercado-Corona, D. (2004). Validity of the eating attitudes test: A study of Mexican eating disorders patients. *Eating & Weight Disorders, 9*, 243-248.
- Andersen, A. E., Bowers, W. A., & Watson, T. (2001). A slimming program for eating disorders not otherwise specified. Reconceptualizing a confusing, residual diagnostic category. *Psychiatric Clinics of North America, 24*, 271-280.
- Attia E., Haiman C., Walsh B.T., & Flater S. (1998). Does fluoxetine augment the inpatient treatment of anorexia nervosa? *American Journal of Psychiatry, 155*, 548-551.
- Bean, P., Maddocks, M.B., Timmel, P., & Weltzin, T. (2005). Gender differences in the progression of co-morbid psychopathology symptoms of eating disordered patients. *Eating and Weight Disorders, 10*, 168-174.
- Ben-Tovim, D. I., Walker, K., Gilchrist, P., Freeman, R., Kalucy, R., & Esterman, A. (2001). Outcome in patients with eating disorders: A 5-year study. *Lancet, 357*, 1254-1257.
- Beumont, P. J. V., Kopec-Schrader, E. M., Talbot, P., & Touyz, S. W. (1993). Measuring the specific psychopathology of eating disorder patients. *Australia and New Zealand Journal of Psychiatry, 27*, 506-511.
- Bjorck, C., Clinton, D., Sohlberg, S., Hallstrom, T., & Norring, C. (2003). Interpersonal profiles in eating disorders: Ratings of SASB self-image. *Psychology and Psychotherapy:*

*Theory, Research and Practice*, 76, 337-349.

- Blinder, B. J., Cumella, E.J., & Sanathara, V.A. (2006). Psychiatric comorbidities of female inpatients with eating disorders. *Psychosomatic Medicine*, 68, 454-462.
- Boyd, C., Abraham, S., & Kellow, J. (2005). Psychological features are important predictors of functional gastrointestinal disorders in patients with eating disorders. *Scandinavian Journal of Gastroenterology*, 40, 929-935.
- Broberg, A. G., Hjalmer, I., & Nevenon, L. (2001). Eating disorders, attachment and interpersonal difficulties: A comparison between 18- to 24-year-old patients and normal controls. *European Eating Disorders Review*, 9, 381-396.
- Bryant-Waugh, R. J., Cooper, P. J., Taylor, C. L., & Lask, B. D. (1996). The use of the Eating Disorder Examination with children: A pilot study. *International Journal of Eating Disorders*, 19, 391-397.
- Bunnell, D. W., Cooper, P. J., Hertz, S., & Shenker, I. R. (1992). Body shape concerns among adolescents. *International Journal of Eating Disorders*, 11, 79-83.
- Button, E. J., Benson, E., Nollett, C., & Palmer, R. (2005). Don't forget EDNOS (eating disorder not otherwise specified): Patterns of service use in an eating disorders service. *Psychiatric Bulletin*, 29, 134-136.
- Cachelin, F. M., & Maher, B. A. (1998). Is amenorrhea a critical criterion for anorexia nervosa? *Journal of Psychosomatic Research*, 44, 435-440.
- Carlat, D. J., Camargo, C. A., Jr., & Herzog, D. B. (1997). Eating disorders in males: A report on 135 patients. *American Journal of Psychiatry*, 154, 1127-1132.
- Casasnovas, C., Fernandez-Aranda, F., Granero, R., Krug, I., Jimenez-Murcia, S., Bulik, C. M., et al. (2007). Motivation to change in eating disorders: Clinical and therapeutic

- implications. *European Eating Disorders Review*, 15, 449-456.
- Clinton, D. N., & Glant, R. (1992). The eating disorders spectrum of DSM-III-R. Clinical features and psychosocial concomitants of 86 consecutive cases from a Swedish urban catchment area. *Journal of Nervous & Mental Disease*, 180, 244-250.
- Clinton, D., & Norring, C. (1999). The Rating of Anorexia and Bulimia (RAB) Interview: Development and preliminary validation. *European Eating Disorders Review*, 7, 362-371.
- Clinton, D., & Norring, C. (2005). The comparative utility of statistically derived eating disorder clusters and DSM-IV diagnoses: Relationship to symptomatology and psychiatric comorbidity at intake and follow-up. *Eating Behaviors*, 6, 403-418.
- Clinton, D., Button, E., Norring, C., & Palmer, R. (2005). Clarifying the nature of EDNOS: Cluster analysis, diagnosis, and comorbidity. In C. Norring & R. Palmer (Eds.), *Eating disorder not otherwise specified: Scientific and clinical perspectives on the other eating disorders* (pp. 131-160). New York: Routledge.<sup>1</sup>
- Corbridge, C., & Bell, L. (1996). An audit of people with eating disorders treated by adult mental health services. *European Eating Disorders Review*, 4, 241-248.
- Crisp A., Norton K., Gowers S., Halek C., Bowyer C., Yeldham D., Levett G., & Bhat A. (1991). A controlled study of the effect of therapies aimed at adolescent and family psychopathology in anorexia nervosa. *British Journal of Psychiatry*, 159, 325-333.

---

<sup>1</sup> This article featured 2 studies with slightly different methodologies, each of which were rated separately.

- Crow, S. J., Agras, W. S., Halmi, K., Mitchell, J. E., & Kraemer, H. C. (2002). Full syndromal versus subthreshold anorexia nervosa, bulimia nervosa, and binge eating disorder: A multi-center study. *International Journal of Eating Disorders, 32*, 309-318.
- Cumella, E. J., Wall, A. D., & Kerr-Almeida, N. (1999). MMPI-A in the inpatient assessment of adolescents with eating disorders. *Journal of Personality Assessment, 73*, 31-44.
- Cumella, E. J., Wall, A. D., & Kerr-Almeida, N. (2000). MMPI-2 in the inpatient assessment of women with eating disorders. *Journal of Personality Assessment, 75*, 387-403.
- Dare C., Eisler I., Russell G., Treasure J., & Dodge L. (2001). Psychological therapies for adults with anorexia nervosa. *British Journal of Psychiatry, 178*, 216-221.
- Durham, D. R. (1990). Personality variables among persons with eating disorders. *Dissertation Abstracts International, 51*(06), 3113B. (UMI No. 9033253).
- Edwin, D. H., & Andersen, A. E. (1990). Psychometric testing in 76 males with eating disorders. In A. E. Andersen (Ed.), *Males with eating disorders* (pp. 116-130). New York: Brunner/Mazel.
- Eisler I., Dare C., Russell G., Szmukler G., le Grange D., & Dodge E. (1997). Family and individual therapy in anorexia nervosa: A 5-year follow-up. *Archives of General Psychiatry, 54*, 1025-1030.
- Ekeroth, K., Broberg, A. G., & Nevonen, L. (2004). Eating disorders and general psychopathology: A comparison between young adult patients and normal controls with and without self-reported eating problems. *European Eating Disorders Review, 12*, 208-216.

- Ekeroth, K., Engstrom, I., Hagglof, B., & Broberg, A. G. (2003). Self-reported competencies and problems among Swedish girls with eating disorders and a control sample, using the Youth Self-Report. *Eating and Weight Disorders, 8*, 274-281.
- Fairburn, C. G., Cooper, Z., Doll, H.A., & Davies, B.A. (2005). Identifying dieters who will develop an eating disorder: A prospective, population-based study. *American Journal of Psychiatry, 162*, 2249-2255.
- Favaro, A., & Santonastaso, P. (1996). Purging behaviors, suicide attempts, and psychiatric symptoms in 398 eating disordered subjects. *International Journal of Eating Disorders, 20*, 99-103.
- Favaro, A., & Santonastaso, P. (1997). Suicidality in eating disorders: Clinical and psychological correlates. *Acta Psychiatrica Scandinavica, 95*, 508-514.
- Fornari, V. M., Braun, D. L., Sunday, S. R., Sandberg, D. E., Matthews, M., Chen, I. L., et al. (1994). Seasonal patterns in eating disorder subgroups. *Comprehensive Psychiatry, 35*, 450-456.
- Fullerton, D. T., Wonderlich, S. A., & Gosnell, B. A. (1995). Clinical characteristics of eating disorder patients who report sexual or physical abuse. *International Journal of Eating Disorders, 17*, 243-249.
- Gerlinghoff, M., Backmund, H., & Franzen, U. (1998). Evaluation of day treatment programme for eating disorders. *European Eating Disorders Review, 6*, 96-106.
- Ghadirian, A. M., Marini, N., Jabalpurwala, S., & Steiger, H. (1999). Seasonal mood patterns in eating disorders. *General Hospital Psychiatry, 21*, 354-359.
- Gleaves, D. H., & Eberenz, K. P. (1995). Correlates of dissociative symptoms among women with eating disorders. *Journal of Psychiatric Research, 29*, 417-426.

Gleaves, D. H., Eberenz, K. P., & May, M. C. (1998). Scope and significance of posttraumatic symptomatology among women hospitalized for an eating disorder. *International Journal of Eating Disorders, 24*, 147-156.

Glorio, R., Allevato, M., De Pablo, A., Abbruzzese, M., Carmona, L., Savarin, M., et al. (2000). Prevalence of cutaneous manifestations in 200 patients with eating disorders. *International Journal of Dermatology, 39*, 348-353.

Godt, K. (2002). Personality disorders and eating disorders: The prevalence of personality disorders in 176 female outpatients with eating disorders. *European Eating Disorders Review, 10*, 102-109.

Goebel, G., Schweiger, U., Kruger, R., & Fichter, M. M. (1999). Predictors of bone mineral density in patients with eating disorders. *International Journal of Eating Disorders, 25*, 143-150.

Gowers S., Norton K., Halek C., & Crisp A. (1994). Outcome of outpatient psychotherapy in a random allocation treatment study of anorexia nervosa. *International Journal of Eating Disorders, 15*, 165-177.

Griffiths, R. A., Beumont, P. J. V., Russell, J., Schotte, D., Thornton, C., Touyz, S., et al. (1999). Sociocultural attitudes toward appearance in dieting disordered and nondieting disordered subjects. *European Eating Disorders Review, 7*, 193-203.

Hasler, G., Delsignore, A., Milos, G., Buddeberg, C., & Schnyder, U. (2004). Application of Prochaska's transtheoretical model of change to patients with eating disorders. *Journal of Psychosomatic Research, 57*, 67-72.

Joyce, J. M., Warren, D. L., Humphries, L. L., Smith, A. J., & Coon, J. S. (1990). Osteoporosis in women with eating disorders: Comparison of physical parameters,

- exercise, and menstrual status with SPA and DPA evaluation. *Journal of Nuclear Medicine*, 31, 325-331.
- Kaye W., Toshihiko N., Weltzin, T., Hsu G., Sokol M., McConaha C., Plotnicov K., Weise J., & Deep D. (2001). Double-blind placebo-controlled administration of fluoxetine in restricting- and restricting-purging-type anorexia nervosa. *Biological Psychiatry*, 49, 644-652.
- Klibanski A., Biller B., Schoenfeld D., Herzog D., & Saxe V. (1995). The effects of estrogen administration on trabecular bone loss in young women with anorexia nervosa. *Journal of Clinical Endocrinology and Metabolism*, 80, 898-904.
- Kovacs, D., Mahon, J., & Palmer, R. L. (2002). Chewing and spitting out food among eating-disordered patients. *International Journal of Eating Disorders*, 32, 112-115.
- Kurth, C. L., Krahn, D. D., Nairn, K., & Drewnowski, A. (1995). The severity of dieting and bingeing behaviors in college women: Interview validation of survey data. *Journal of Psychiatric Research*, 29, 211-225.
- Le Grange, D., Loeb, K. L., Van Orman, S., & Jellar, C. C. (2004). Bulimia nervosa in adolescents: A disorder in evolution? *Archives of Pediatric Adolescent Medicine*, 158, 478-482.
- Lee, S., Chan, Y. Y., & Hsu, L. K. (2003). The intermediate-term outcome of Chinese patients with anorexia nervosa in Hong Kong. *American Journal of Psychiatry*, 160, 967-972.
- Lee, S., Ho, T. P., & Hsu, L. K. G. (1993). Fat phobic and non-fat phobic anorexia nervosa: A comparative study of 70 Chinese patients in Hong Kong. *Psychological Medicine*, 23, 999-1017.

- Lee, S., Kwok, K., Liao, C., & Leung, T. (2002). Screening Chinese patients with eating disorders using the eating attitudes test in Hong Kong. *International Journal of Eating Disorders, 32*, 91-97.
- Lee, S., Lee, A. M., & Leung, T. (1998). Cross-cultural validity of the eating disorder inventory: A study of Chinese patients with eating disorders in Hong Kong. *International Journal of Eating Disorders, 23*, 177-188.
- Lee, S., Lee, A. M., Ngai, E., Lee, D. T. S., & Wing, Y. K. (2001). Rationales for food refusal in Chinese patients with anorexia nervosa. *International Journal of Eating Disorders, 29*, 224-229.
- Levine, J., Gur, E., Loewenthal, R., Vishne, T., Dwolatzky, T., van Beynum, I., et al. (2007). Plasma homocysteine levels in female patients with eating disorders. *International Journal of Eating Disorders, 40*, 277-284.
- Marañon, I., Echeburua, E., & Grijalvo, J. (2004). Prevalence of personality disorders in patients with eating disorders: A pilot study using the IPDE. *European Eating Disorders Review, 12*, 217-222.
- Martin, C. K., Williamson, D. A., & Thaw, J. M. (2000). Criterion validity of the multi-axial assessment of eating disorders symptoms. *International Journal of Eating Disorders, 28*, 303-310.
- McDermott, B., Forbes, D., Harris, C., McCormack, J., & Gibbon, P. (2006). Non-eating disorders psychopathology in children and adolescents with eating disorders: Implications for malnutrition and symptom severity. *Journal of Psychosomatic Research, 60*, 257-261.

- McIntosh V., Jordan J., Carter F., Luty S., McKenzie J., Bulik C., Frampton C., & Joyce P. (2005). Three psychotherapies for anorexia nervosa: a randomized, controlled trial. *American Journal of Psychiatry, 162*, 741-747.
- Miller K., Grieco K., & Klibanski A. (2005). Testosterone administration in women with anorexia nervosa. *Journal of Clinical Endocrinology and Metabolism, 90*, 1428-1433.
- Milos, G. F., Spindler, A. M., Buddeberg, C., & Cramer, A. (2003). Axes I and II comorbidity and treatment experiences in eating disorder subjects. *Psychotherapy & Psychosomatics, 72*, 276-285.
- Milos, G., Spindler, A., Hepp, U., & Schnyder, U. (2004). Suicide attempts and suicidal ideation: Links with psychiatric comorbidity in eating disorder subjects. *General Hospital Psychiatry, 26*, 129-135.
- Mizes, J. S., Christiano, B., Madison, J., Post, G., Seime, R., & Varnado, P. (2000). Development of the Mizes Anorectic Cognitions Questionnaire-Revised: Psychometric properties and factor structure in a large sample of eating disorder patients. *International Journal of Eating Disorders, 28*, 415-421.
- Mizes, J. S., Heffner, M., Madison, J. K., & Varnado-Sullivan, P. (2004). The validity of subjective measures of body image disturbance. *Eating Behaviors, 5*, 55-66.
- Moor, S., Vartanian, L. R., Touyz, S. W., & Beumont, P. J. V. (2004). Psychopathology of EDNOS patients: To whom do they compare? *Clinical Psychologist, 2*, 70-75.
- Nevonen, L., & Broberg, A. G. (2001). Validating the Eating Disorder Inventory-2 (EDI-2) in Sweden. *Eating & Weight Disorders, 6*, 59-67.

- Nollett, C. L., & Button, E. J. (2005). Questionnaire measures of psychopathology in eating disorders: Comparisons between clinical groups. *European Eating Disorders Review, 13*, 211-215.
- Noma, S., Nakai, Y., Hamagaki, S., Uehara, M., Hayashi, A., & Hayashi, T. (2006). Comparison between the SCOFF questionnaire and the Eating Attitudes Test in patients with eating disorders. *International Journal of Psychiatry in Clinical Practice, 10*, 27-32.
- Panagiotopoulos, C., McCrindle, B. W., Hick, K., & Katzman, D. K. (2000). Electrocardiographic findings in adolescents with eating disorders. *Pediatrics, 105*, 1100-1105.
- Pike K.M., Walsh B.T., Vitousek K., Wilson G.T., & Bauer J. (2003). Cognitive behavior therapy in the posthospitalization treatment of anorexia nervosa. *American Journal of Psychiatry, 160*, 2046-2049.
- Probst, M., Vandereycken, W., Van Coppenolle, H., & Vanderlinden, J. (1995). The Body Attitude Test for patients with an eating disorder: Psychometric characteristics of a new questionnaire. *Eating Disorders: The Journal of Treatment & Prevention, 3*, 133-144.
- Ravaldi, C., Vannacci, A., Truglia, E., Zucchi, T., Mannucci, E., Rotella, C. M., Faravelli, C., & Ricca, V. (2004). The Eating Disorder Examination as a retrospective interview. *Eating & Weight Disorders, 9*, 228-231.
- Ricca, V., Mannucci, E., Mezzani, B., Di Bernardo, M., Zucchi, T., Paionni, A., et al. (2001). Psychopathological and clinical features of outpatients with an eating disorder not otherwise specified. *Eating & Weight Disorders, 6*, 157-165.

- Ro, O., Martinsen, E. W., Hoffart, A., & Rosenvinge, J. (2005). Two-year prospective study of personality disorders in adults with longstanding eating disorders. *International Journal of Eating Disorders, 37*, 112-118.
- Roberto, C. A., Steinglass, J., Mayer, L., Attia, E., & Walsh, B. T. (2007). The clinical significance of amenorrhea as a diagnostic criterion for anorexia nervosa. Unpublished manuscript, Yale University, New Haven, Connecticut.
- Salvemini, V., Berna, G., Foca, F., Indrimi, M., Sammartino, F., Spinosa, L., et al. (2000). Differences and similarities in the personality structure of 327 women with eating disorders. *Eating & Weight Disorders, 5*, 108-115.
- Schaefer, W. K., MacLennan, R. N., Yaholnitsky-Smith, S. A., & Stover, E. D. (1998). Psychometric evaluation of the eating disorder inventory (EDI) in a clinical group. *Psychology and Health, 13*, 873-881.
- Schork, E. J., Eckert, E. D., & Halmi, K. A. (1994). The relationship between psychopathology, eating disorder diagnosis, and clinical outcome at 10-year follow-up in anorexia nervosa. *Comprehensive Psychiatry, 35*, 113-123.
- Shafran, R., Fairburn, C. G., Robinson, P., & Lask, B. (2004). Body checking and its avoidance in eating disorders. *International Journal of Eating Disorders, 35*, 93-101.
- Solenberger, S. E. (2001). Exercise and eating disorders: A 3-year inpatient hospital record analysis. *Eating Behaviors, 2*, 151-168.
- Spindler, A., & Milos, G. (2007). Links between eating disorder symptom severity and psychiatric comorbidity. *Eating Behaviors, 8*, 364-373.
- Strokosch, G. R., Friedman, A. J., Wu, S-C., & Kamin, M. (2006). Effects of an oral contraceptive (norgestimate/ethinyl estradiol) on bone mineral density in adolescent

- females with anorexia nervosa: A double-blind, placebo-controlled study. *Journal of Adolescent Health, 39*, 819-827.
- Thurfjell, B., Edlund, B., Arinell, H., Hagglof, B., & Engstrom, I. (2003). Psychometric properties of Eating Disorder Inventory for children (EDI-C) in Swedish girls with and without a known eating disorder. *Eating & Weight Disorders, 8*, 296-303.
- Tobin, D. L., Griffing, A., & Griffing, S. (1997). An examination of subtype criteria for bulimia nervosa. *International Journal of Eating Disorders, 22*, 179-186.
- Treasure J., Todd G., Brolly M., Tiller J., Nehmed A., & Denman F. (1995). A pilot study of a randomized trial of cognitive analytical therapy vs educational behavioral therapy for adult anorexia nervosa. *Behavior Research and Therapy, 33*, 363-367.
- Troop, N. A., Murphy, F., Bramon, E., & Treasure, J. L. (2000). Disgust sensitivity in eating disorders: A preliminary investigation. *International Journal of Eating Disorders, 27*, 446-451.
- Turner, H., & Bryant-Waugh, R. (2004). Eating disorder not otherwise specified (EDNOS): Profiles of clients presenting at a community eating disorder service. *European Eating Disorders Review, 12*, 18-26.
- Vandereycken, W., & Pieters, G. (1992). A large-scale longitudinal follow-up study of patients with eating disorders: Methodological issues and preliminary results. In W. Herzog, H.-C. Deter & W. Vandereycken (Eds.), *The course of eating disorders: Long-term follow-up studies of anorexia and bulimia nervosa* (pp. 182-197). New York: Springer-Verlag.
- Vandereycken, W. (1993). The Eating Disorder Evaluation Scale (EDES). *Eating Disorders: The Journal of Treatment & Prevention, 1*, 115-122.

- Vanderlinden, J., Vandereycken, W., van Dyck, R., & Vertommen, H. (1993). Dissociative experiences and trauma in eating disorders. *International Journal of Eating Disorders*, *13*, 187-193.
- Watson, T. L., & Andersen, A. E. (2003). A critical examination of the amenorrhea and weight criteria for diagnosing anorexia nervosa. *Acta Psychiatrica Scandinavica*, *108*, 175-182.
- Wilks, J. (2006). The role of emotional dysregulation in the treatment of eating disorders. *Dissertation Abstracts International*, *66*(12). (UMI 3198495).
- Williamson, D. A., Gleaves, D. H., & Savin, S. S. (1992). Empirical classification of eating disorder not otherwise specified: Support for DSM-IV changes. *Journal of Psychopathology and Behavioral Assessment*, *14*, 201-216.
- Williamson, D. A., Womble, L. G., Smeets, M. A., Netemeyer, R. G., Thaw, J. M., Kutlesic, V., et al. (2002). Latent structure of eating disorder symptoms: a factor analytic and taxometric investigation. *American Journal of Psychiatry*, *159*, 412-418.
- Wunderlich, U., Gerlinghoff, M., & Backmund, H. (2004). Eating disturbances in siblings of patients with eating disorders. *Eating & Weight Disorders*, *9*, 258-263
